# Supplementary material for: Leishmania braziliensis Infection Enhances Toll-Like Receptors 2 and 4 Expression and Triggers TNF-α and IL-10 Production in Human Cutaneous Leishmaniasis
Source: PubMed Central journal article supplement (PMC6507514; doi:10.3389/fcimb.2019.00120), 2019-05-02
Supplement: Image_4.pdf [file Image_4.pdf]

**Supplementary figure 1. Expression of TLR2 and TLR4 in Monocytes from Cutaneous Leishmaniasis Patients (CL) and Healthy Subjects (HS) after infection with *L.braziliensis* for 4 and 24 hours.** PBMC-derived monocytes from CL patients (n=05) and HS (n=05) were infected for 4 and 24 hours with *L. braziliensis* (ratio 5:1) stained with CFSE. **(A)** Expression of TLR2 and TLR4 in monocytes from CL patients **(B)** Expression of TLR2 and TLR4 in monocytes from HS. Data are represented by the median of the mean intensity of fluorescence (MIF). Mann Whitney test were used for statistical analyses.

**Supplementary figure 2. Expression of TLR2 and TLR4 in Monocytes Subsets from Cutaneous Leishmaniasis patients (CL) after infection with *L.braziliensis* for 4 and 24 hours.** PBMC-derived monocytes from CL patients (n=05) were infected for 4 and 24 hours with *L.braziliensis* (ratio 5:1) stained with CFSE. (A) TLR2 expression in classical (CD14<sup>high</sup>CD16<sup>-</sup>), intermediate (CD14<sup>high</sup>CD16<sup>+</sup>), and non-classical monocytes (CD14<sup>low</sup>CD16<sup>+</sup>) from CL patients. (B) TLR4 expression in monocytes subsets from CL patients after infection by *L. braziliensis*. Data are represented by the median of the mean intensity of fluorescence (MIF). Mann-Whitney and Kruskal-Wallis with Dunn's post-test was used for statistical test was used for statistical analyses (\* $P < 0.05$ , \*\* $P < 0.01$ ,  $P^{***} < 0.001$ ).

**Supplementary figure 3. Expression of TNF and IL-10 in TLR 2(+) and TLR4 (+) Monocytes from CL Patients Infected with *L.braziliensis* after 8 and 24 hours.** PBMC-derived monocytes from CL patients (n=5) were infected with *L.braziliensis* (ratio 5:1) for 8 and 24 hours. The data represent the frequency of cells expressing TNF **(A)** and IL-10 **(B)** on monocytes expressing TLR<sup>(+)</sup> and TLR4<sup>(+)</sup>. The percentage of CD14+ cells expressing cytokines on cells TLR<sup>(+)</sup> was determined by gating on the corresponding population. The results are expressed as median and Mann-Whitney test was used for statistical analyses (\* $P < 0.05$ ).
